# Supplementary material
Source: PubMed Central journal article supplement (PMC10084460)
Supplement: sj-pdf-1-jag-10.1177_07334648221146252.pdf [file sj-pdf-1-jag-10.1177_07334648221146252.pdf]

**Supplementary Table 1.** Eligibility criteria

| <b>Concepts</b>                                                                | <b>Terms</b>                                                                                                                                                                                                                                                                                                                                                                                                                                                                                                                                                                                                                                                                                                                                                                                                                                    |
|--------------------------------------------------------------------------------|-------------------------------------------------------------------------------------------------------------------------------------------------------------------------------------------------------------------------------------------------------------------------------------------------------------------------------------------------------------------------------------------------------------------------------------------------------------------------------------------------------------------------------------------------------------------------------------------------------------------------------------------------------------------------------------------------------------------------------------------------------------------------------------------------------------------------------------------------|
| Eligibility criteria for studies where healthcare workers form the study group | <p><i>i)</i> All disciplines of healthcare workers in long-term care homes are included as long as they are fully qualified. Samples are mixed (e.g., nurse, social workers).</p> <p><i>ii)</i> Studies are included if published in English, recount the experiences of healthcare workers, or where the results for healthcare workers are provided separately.</p> <p><i>iii)</i> Studies are not included where it is not possible to determine the study group, or the study was not about health workers in long-term care.</p>                                                                                                                                                                                                                                                                                                           |
| General study eligibility criteria                                             | <p><i>i)</i> Only those articles published from inception of the pandemic to June 2022 are included (a period of 2 years is deemed appropriate for inclusion in this review as it is the 2-year mark since the pandemic).</p> <p><i>ii)</i> The aim/purpose of the study is clearly stated or easily inferred from the text.</p> <p><i>iii)</i> Articles from non-English speaking countries are included and allocated if directly relevant to discussion of healthcare worker experience during the pandemic.</p> <p><i>iv)</i> The paper is a reported a broad range of studies including large quantitative studies, small qualitative studies (in-person, telephone), key informant interviews, and methods using social media, discussion groups, and standard data collection techniques. Review or discussion papers were excluded.</p> |

**Supplementary Table 2.** Search terms

| <b>Concepts</b> | <b>Terms</b>                                                                                                                               |
|-----------------|--------------------------------------------------------------------------------------------------------------------------------------------|
| Frontline staff | Health care worker<br>Nurse                                                                                                                |
| Long-term Care  | Long-term care<br>Long term residence<br>Long term facilit*<br>Nursing home*<br>Residential care<br>Residential facility*<br>Old aged home |
| Context         | COVID-19*<br>novel coronavirus 2019<br>SARS- CoV-2'<br>Mental health                                                                       |

*\*Example of search terms used.*
